# Supplementary material for: Regulators of TNFα mediated insulin resistance elucidated by quantitative proteomics
Source: PubMed Central journal article supplement (PMC7705713; doi:10.1038/s41598-020-77914-1), 2020-11-30

## Regulators of TNF $\alpha$ Mediated Insulin Resistance Elucidated by Quantitative Proteomics

Rodrigo Mohallem<sup>1,2</sup> and Uma K. Aryal<sup>1,2\*</sup>

<sup>1</sup>Department of Comparative Pathobiology, Purdue University, West Lafayette, United States. <sup>2</sup>Purdue Proteomics Facility, Bindley Bioscience Center, Purdue University, West Lafayette, United States.

\*Corresponding Author: [uaryal@purdue.edu](mailto:uaryal@purdue.edu)

**Figure S1.** Experimental Design and Label-Free Quantitative Secretomic and Phosphoproteomic Analysis Workflow. (A) Spend media was collected and concentrated. Protein was extracted, with sequential reduction and alkylation of cysteine disulfide bonds. Proteins were digested with Lys-C/Trypsin, desalted and analyzed by HPLC-MS/MS. (B) Protein was extracted, with sequential reduction and alkylation of cysteine disulfide bonds. Proteins were digested with Lys-C/Trypsin, desalted, and phosphopeptides were enriched before HPLC-MS/MS analysis.

**Figure S2.** Treatment groups are highly correlated: (A) PCA plot depiction of all replicates analyzed in the global proteomics. Individual samples are indicated by color, indicated in the figure legend. (B) Scree plot representation of Principal Components.

**Figure S3.** Secretome analysis of TNF $\alpha$  chronically treated adipocytes. (A) Heat map of all quantified proteins for both 4D and 8D time points. Color scale represents Z-scored LFQ values. (B) Volcano plots of all quantified proteins in each time point. Horizontal red line represents the Log<sub>10</sub> (p value) cutoff, and vertical blue lines represent the Log<sub>2</sub> (Fold Change) cutoff.

**Figure S4.** Full-length blots of Csf1, Actin Mif expression levels in 4D and 8D TNF $\alpha$  treated adipocytes 4.

**Figure S1**

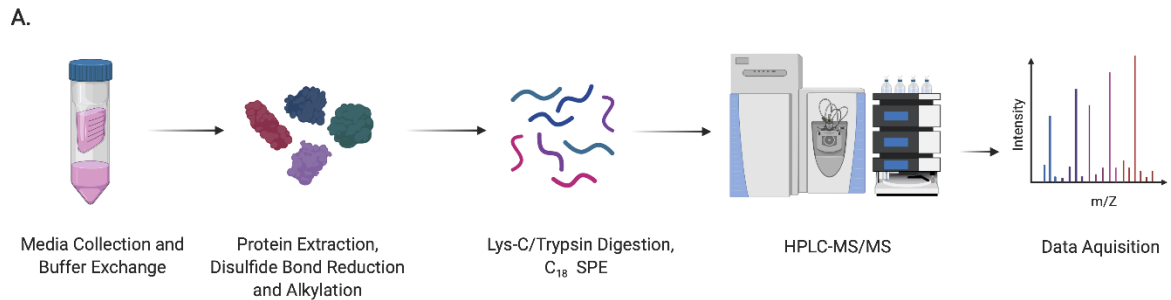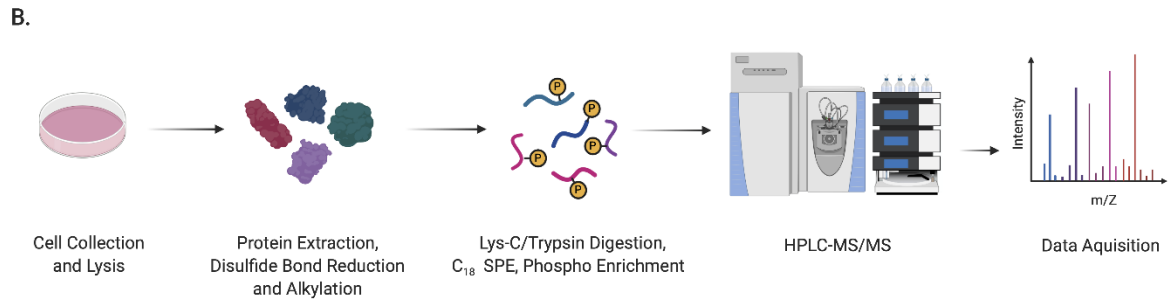

Figure S2

A.

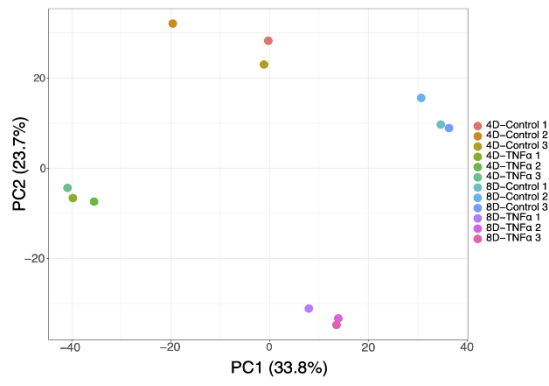

B.

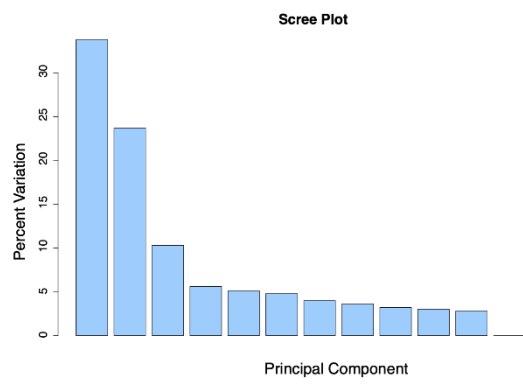

Figure S3

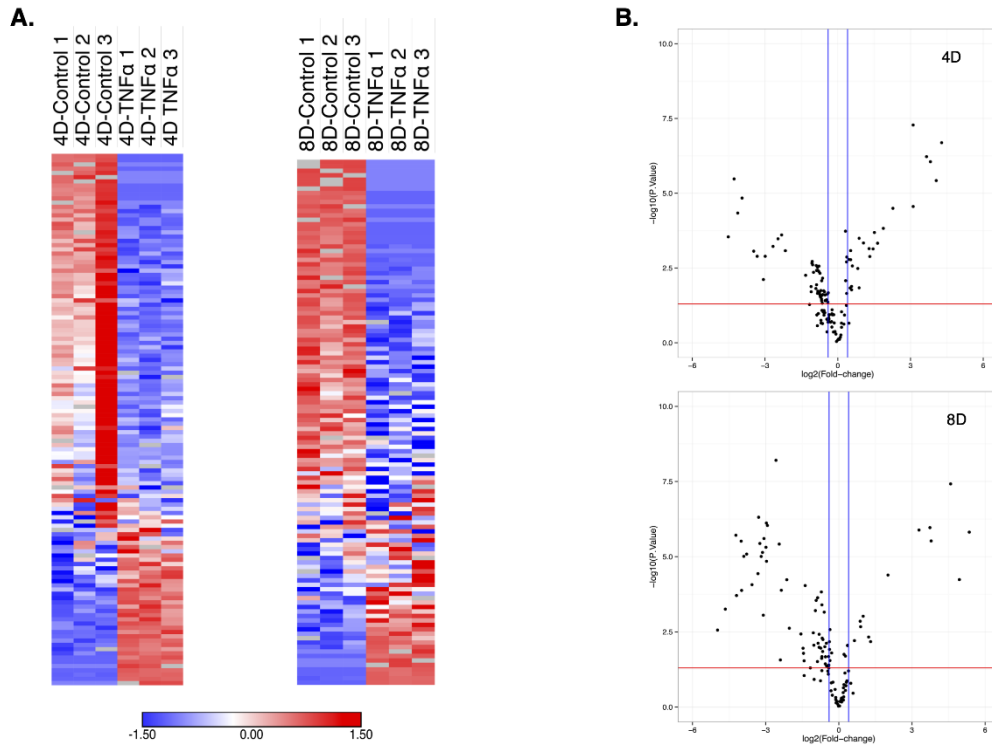

Supplement: 41598_2020_77914_MOESM1_ESM.pdf [file 41598_2020_77914_MOESM1_ESM.pdf]
